# Supplementary material for: Factors Affecting Technical Difficulty in Balloon Enteroscopy-Assisted Endoscopic Retrograde Cholangiopancreatography in Patients with Surgically Altered Anatomy
Source: PubMed Central journal article supplement (PMC7961549; doi:10.3390/jcm10051100), 2021-03-06
Supplement: jcm-10-01100-s001.pdf [file jcm-10-01100-s001.pdf]

**Supplementary Table S1.** Association of each factor with success and failure in patients undergoing enteroscopy.

|                                                                          | <b>Success</b> | <b>Failure</b> |
|--------------------------------------------------------------------------|----------------|----------------|
| <i>Enteroscopy, No. of cases</i>                                         | 84             | 7              |
| Age, mean (SD)                                                           | 73.2 (9.75)    | 65.4 (12.63)   |
| Sex, n, male/female                                                      | 64/20          | 5/2            |
| Anatomy, n, R-Y total gastrectomy/R-Y partial gastrectomy/B-II/PD/others | 31/24/7/16/6   | 1/2/1/2/1      |
| Gastrectomy n, yes/no                                                    | 79/5           | 6/1            |
| Malignant disease, n, yes/no                                             | 16/68          | 2/5            |
| Endoscope type, n, single/double                                         | 40/44          | 5/2            |
| Skill, n, expert/ trainee                                                | 45/39          | 2/5            |
| Emergency, n, emergency procedure/secondary procedure                    | 40/44          | 1/6            |

Abbreviations: B-II, Billroth II; PD, Pancreaticoduodenectomy; R-Y, Roux-en-Y.

**Supplementary Table S2.** Association of each factor with success and failure in patients undergoing ERCP procedure.

|                                                                          | <b>Success</b> | <b>Failure</b> | <b>p value</b> |
|--------------------------------------------------------------------------|----------------|----------------|----------------|
| <i>Procedure, No. of cases</i>                                           | 71             | 20             |                |
| Age, mean (SD)                                                           | 74.9 (8.965)   | 64.7 (10.179)  | 0.833          |
| Sex, n, male/female                                                      | 55/16          | 6/14           | 0.339          |
| Anatomy, n, R-Y total gastrectomy/R-Y partial gastrectomy/B-II/PD/others | 27/17/7/15/5   | 4/9/0/1/2      | 0.077          |
| gastrectomy n, yes/no                                                    | 66/5           | 19/1           | 0.606          |
| Papilla n, native papilla/anastomosis                                    | 54/16          | 17/3           | 0.338          |
| Malignant disease, n, yes/no                                             | 12/59          | 6/14           | 0.162          |
| Endoscope type, n, single/double                                         | 35/36          | 10/10          | 0.578          |
| Skill, n, expert/trainee                                                 | 38/33          | 9/11           | 0.337          |
| Emergency, n, emergency procedure/secondary procedure                    | 34/37          | 7/13           | 0.222          |

Abbreviations: B-II, Billroth II; PD, Pancreaticoduodenectomy; R-Y, Roux-en-Y.
